# Supplementary material
Source: publisher figshare collection journal article supplement (https://gsajournals.figshare.com/ndownloader/files/14961674)
Supplement: Supplementary file 1 [file 14961674]

**Table S2. Cloning primers used in this study**

| **Gene** | **Forward Primer** | **Reverse Primer** |
| --- | --- | --- |
| *kbp-2* | tttaagcttgagttgtgtccagcatttg | tttaagctttccaattcggagatgatcg |
| *kbp-4* | TTTAAGCTTCGGATCTCCAAGAAGTTTGC | TTTAAGCTTGACCTTCTTCAGCTCATCC |
| *mis-12* | TTTAAGCTTCGTCTCTGCTTGCTATCC | GCGGAGctgaacatttga |
| *ndc-80* | TTTAAGCTTTCAAGAATCAGAGACGACATCC | TTTAAGCTTTCTCTGATGCAACTGTCGG |
| *ska-3* | TTTAAGCTTTGAGACTGACGCAGGAAATG | TTTAAGCTTTCGTCGTTCGTTGGATG |

Restriction enzyme sites are underlined.

a. HindIII restriction site near the terminus of the amplified PCR product was used for cloning.
